# Supplementary material
Source: MDPI journal article supplement (https://www.mdpi.com/1424-8247/15/5/605)
Supplement: s1 [file s1]

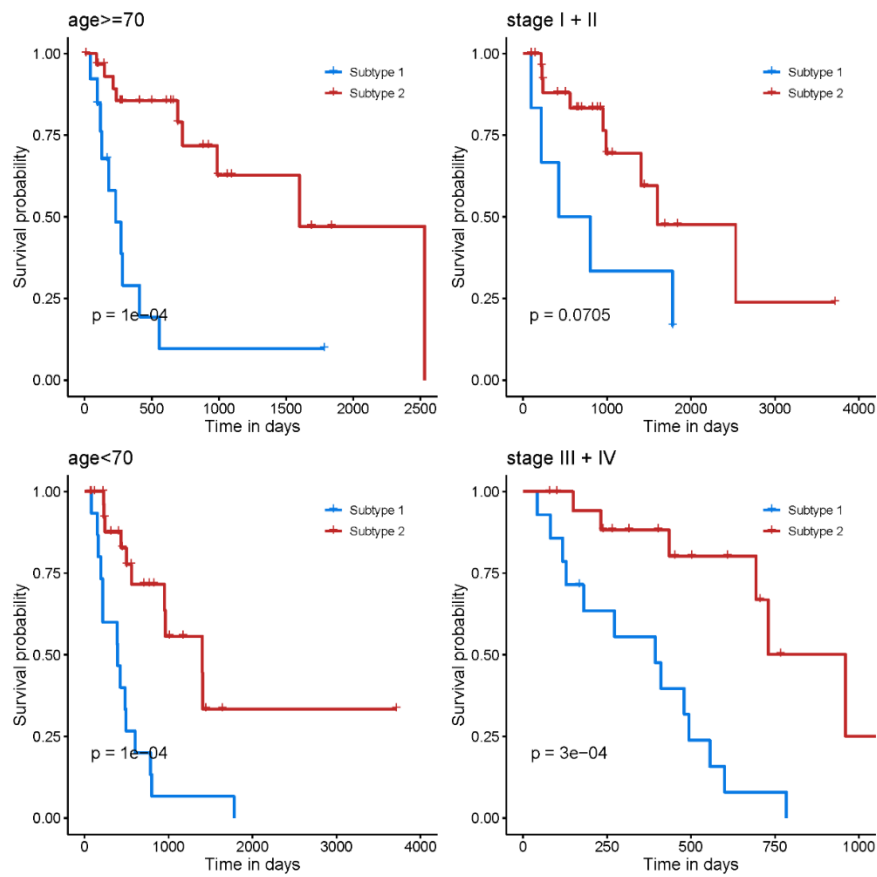

**Supplementary Fig. S1 Subgroup analyses revealed by Kaplan-Meier survival curve.**

Stratified survival analyses based on the clinicopathological features age and histological stage for the EAC subtypes in the TCGA-EAC cohort.

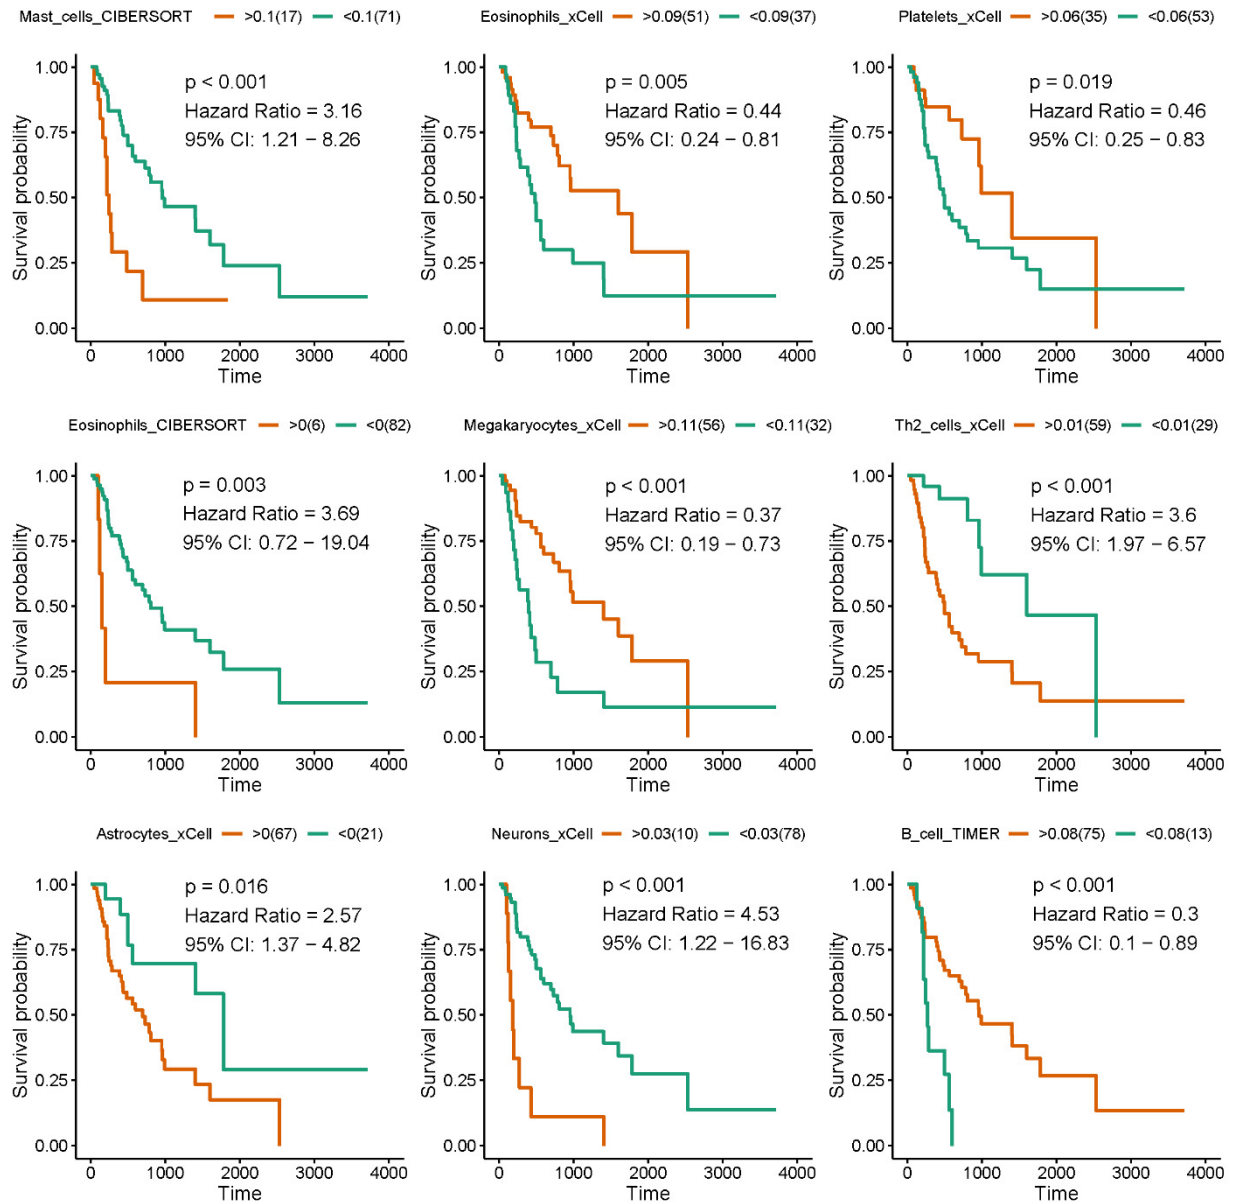

**Supplementary Fig. S2 Kaplan-Meier survival curve of TME scores in the TCGA-EAC cohort.**
